# Supplementary material for: Cytotoxicity of Quantum Dots in Receptor-Mediated Endocytic and Pinocytic Pathways in Yeast
Source: MDPI journal article supplement (doi:10.3390/ijms25094714), 2024-04-26
Supplement: s1 [file s1]

## Supplementary Data

### Growth Assay

Comprehensive evaluation of the QDs' effects on yeast proliferation was performed by measuring the optical density (OD) of the yeast cultures, as illustrated in Supplementary Figure S1. A notable decline in yeast growth was observed after 6 hours following QD treatment, even at the minimal concentration of 4  $\mu\text{g/mL}$ .

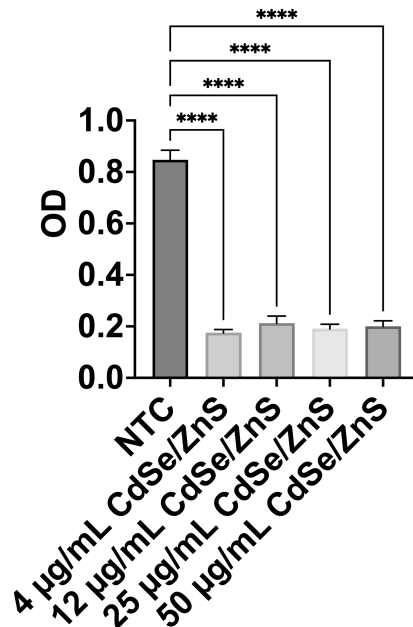

**Supplementary Figure S1.** Growth assay of yeast cells in varying concentrations of QDs (4  $\mu\text{g/mL}$ , 12  $\mu\text{g/mL}$ , 25  $\mu\text{g/mL}$ , and 50  $\mu\text{g/mL}$ ). NTC - non-treated cells.

### Assessment of Positive Control that interfere with the Endocytic pathway.

Based on our results of the lifespan of Cap1-GFP at the endocytic site (Figure 3), we conducted a positive control experiment using a *VPS1* mutant cells expressing Cap1-GFP. Time-lapse fluorescent videos were utilized to determine the lifespan of Cap1-GFP in the mutant strain as indicated in the method section.

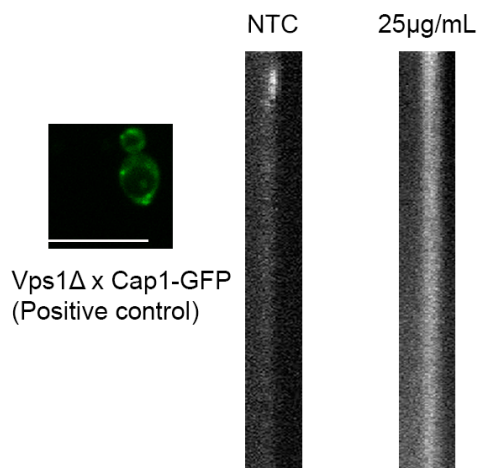

**Supplementary Figure S2.** (A) Representative image from Cap1-GFP in *VPS1Δ* in the presence of CdSe/ZnS QDs. The size bar is equivalent to 10  $\mu\text{m}$ . (B) Kymograph of endocytic patch carrying Cap1-GFP without the presence of CdSe/ZnS QDs. (C) Kymograph of endocytic patch carrying Cap1-GFP in the presence of CdSe/ZnS QDs.

## Characterization of CdSe/ZnS QDs Using Fluorometer Emission, and Dynamic Light Scattering (DLS).

### Emission spectra of QDs upon 280 nm UV excitation.

The Fluorometer Emission technique was used to characterize the peak fluorescence of CdSe/ZnS QDs dispersed in an aqueous solution. QD samples of (5 mg/mL) of QDs were diluted to 5% (v/v) with 18 M $\Omega$  deionized water. A total of 180  $\mu\text{L}$  of the diluted sample was then pipetted into a quartz cuvette, and the emission spectra were measured with a PTI Quantamaster spectrofluorometer with an excitation wavelength of 280 nm.

Our study confirms that emission spectrum of CZW-R-5 (red CdSe/ZnS QDs) in Supplementary Figure S3 displayed monodisperse peak with the emission peaks between 610 - 620 nm, while CZW-G-5 (green CdSe/ZnS QDs) has a monodisperse peak with hydrodynamic diameter around 540-560 nm (Supplementary Figure S3). These findings align with manufacturer specifications.

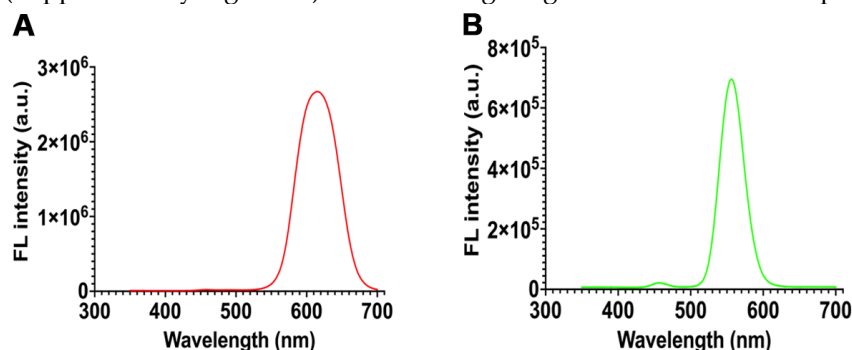

**Supplementary Figure S3** (A) Emission spectrum of red CdSe/ZnS QDs (CZW-R-5) upon 280 nm UV excitation. (B) Emission spectrum of green CdSe/ZnS QDs (CZW-G-5) upon 280 nm UV excitation.

### Dynamic Light Scattering

The dynamic light scattering (DLS) technique was used to characterize the hydrodynamic size of red and green CdSe/ZnS QDs dispersion in an aqueous solution. The stock concentrations (5 mg/mL) of QDs were diluted to 5% (v/v) with 18 M $\Omega$  deionized water. A total of 180  $\mu\text{L}$  of the diluted sample was then pipetted into a quartz cuvette and the hydrodynamic particle size was measured with a Zetasizer Ultra (Malvern Panalytical Ltd., Malvern, UK).

The DLS results of CZW-R-5 (red CdSe/ZnS QDs) in Supplementary Figure S4 has a monodisperse peak with hydrodynamic diameter between 12-13 nm (Supplementary Figure S4), while CZW-G-5 (green CdSe/ZnS QDs) displayed monodisperse peak at hydrodynamic diameters between 13-14 nm, (Supplementary Figure S4).

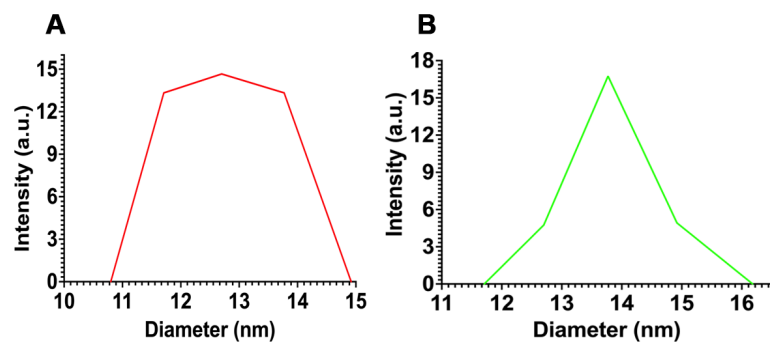

**Supplementary Figure S4** (A) Intensity size distribution of CZW-R-5 (red CdSe/ZnS QDs) obtained by Dynamic Light Scattering. (B) Intensity size distribution of CZW-G-5 (green CdSe/ZnS QDs) obtained by Dynamic Light Scattering.
